# Supplementary material
Source: HighWire-hosted journal article supplement (https://ebm.bmj.com/content/ebmed-2017-110798)
Supplement: inline-supplementary-material-2 [file inline-supplementary-material-2.pdf]

**Supplemental Table 1. Definition of expert opinion in guidelines that reported a definition.**

| <b>Society</b>                                                        | <b>Expert Opinion Definition</b>                                                                                                                                                                                                                                                                                                                                                                                |
|-----------------------------------------------------------------------|-----------------------------------------------------------------------------------------------------------------------------------------------------------------------------------------------------------------------------------------------------------------------------------------------------------------------------------------------------------------------------------------------------------------|
| American academy of Orthopaedic Surgeons (2010- 2013) <sup>1-4</sup>  | The supporting evidence is lacking and requires the work group to make a recommendation based on expert opinion by considering the known potential harm and benefits associated with the treatment. A Consensus recommendation means that expert opinion supports the guideline recommendation even though there is no available empirical evidence that meets the inclusion criteria in the systematic review. |
| Canadian Society of Pharmacology and Therapeutics (2013) <sup>5</sup> | Evidence development in a research context                                                                                                                                                                                                                                                                                                                                                                      |
| Deutsches Ärzteblatt International (2011) <sup>6</sup>                | Expert opinion without explicit critical appraisal, or based on physiology, bench research or “first principles”.                                                                                                                                                                                                                                                                                               |
| American Urological Association (AUA; 2012-2016) <sup>7-11</sup>      | A statement, achieved by consensus of the panel, that is based on members' clinical training, experience, knowledge, and judgment for which there is no evidence                                                                                                                                                                                                                                                |
| National Association of Neonatal Nurses (2011) <sup>12</sup>          | Evidence from the opinion of authorities or reports of expert committees.                                                                                                                                                                                                                                                                                                                                       |
